# Supplementary material
Source: PubMed Central journal article supplement (PMC10872807)
Supplement: NIHMS1933298-supplement-Multimedia_1.pdf [file NIHMS1933298-supplement-Multimedia_1.pdf]

## Supplementary methods and figures

for

### Combined near infrared photoacoustic imaging and ultrasound detects vulnerable atherosclerotic plaque

Martin Karl Schneider<sup>1\*</sup>, James Wang<sup>1\*</sup>, Aris Kare<sup>1</sup>, Shaunak S. Adkar<sup>2</sup>, Darren Salmi<sup>3</sup>, Caitlin F. Bell<sup>2</sup>, Tom Alsaigh<sup>2</sup>, Dhananjay Wagh<sup>4</sup>, John Coller<sup>4</sup>, Aaron Mayer<sup>5</sup>, Sarah J. Snyder<sup>6</sup>, Alexander Borowsky<sup>7</sup>, Steven R. Long<sup>8</sup>, Maarten G. Lansberg<sup>9</sup>, Gary K. Steinberg<sup>10</sup>, Jeremy J. Heit<sup>6</sup>, Nicholas J. Leeper<sup>2</sup>, Katherine W. Ferrara<sup>1</sup>

\*authors contributed equally

<sup>1</sup> Molecular Imaging Program at Stanford and Bio-X Program, Department of Radiology, Stanford University School of Medicine, Palo Alto, CA 94305, USA

<sup>2</sup> Department of Surgery, Division of Vascular Surgery, Stanford University School of Medicine, Stanford, CA 94305, USA.

<sup>3</sup> Department of Pathology, Stanford University School of Medicine, Palo Alto, CA 94305, USA

<sup>4</sup> Sequencing Group Stanford Genomics, Stanford University School of Medicine, Palo Alto, CA 94305, USA

<sup>5</sup> Enable Medicine, Menlo Park, CA, 94025, USA

<sup>6</sup> Department of Radiology and Neurosurgery, Stanford University School of Medicine, Palo Alto, CA 94305, USA

<sup>7</sup> Department of Pathology and Laboratory Medicine, UC Davis Medical Center, Davis, CA 95616, USA

<sup>8</sup>Department of Pathology, University of California San Francisco, San Francisco, CA 94110, USA

<sup>9</sup> Department of Neurology and Neurological Sciences, Stanford University School of Medicine, Palo Alto, CA 94305, USA

<sup>10</sup> Department of Neurosurgery, Stanford University School of Medicine, Palo Alto, CA 94305, USA

## List of contents:

Supplementary Methods.

Supplementary Fig. 1. Spectrum of the NIRAPA signal and the bilirubin correlation.

Supplementary Fig. 2. Comparing NIRAPA signal in fresh and 4% PFA fixed carotid plaque tissue.

Supplementary Fig. 3. Comparison of contrast CT images PAI images using the NIRAPA signal to detect vulnerable plaque composition of a stable carotid artery.

Supplementary Fig. 4. Quantification and statistical comparison of the key gene counts corresponding to NIRAF signal regions.

Supplementary Fig. 5. Spatial correspondence of the transcriptomic and proteomic signals

Supplementary Fig. 6. Comparison of contrast CT images with PAI images using NIRAPA signal to detect vulnerable plaque compositions of a vulnerable carotid artery.

Supplementary Fig. 7. Spatial transcriptomic and proteomic analysis of vulnerable plaque delineates spatially-dependent macrophage populations.

Supplementary Fig. 8. Enrichment results of vulnerable vs stable plaque

Supplementary Table 1. Patient data and experimental plan

Supplementary Table 2. CODEX antibodies

Supplementary Table 3. Differential expression gene and location coordinate tables for the CEA sample from Fig. 4. Including overall populations and macrophage subpopulations

Supplementary Table 4. Differential expression gene and location coordinate tables for the CEA sample from Fig. 6. Including overall populations and macrophage subpopulations

Supplementary Table 5. Differential expression gene and location coordinate tables for the CEA sample from Supplementary Fig. 7. Including overall populations and macrophage subpopulations

Supplementary Video 1. Corresponding PAI images to Supplementary Fig. S3. Serial axial PAI/US sections through the lesion in the carotid artery. The photoacoustic NIRAPA signal is overlaid in color on B-mode US images (black and white) acquired ex vivo.

Supplementary Video 2. Corresponding CT images to Supplementary Fig. S3. Serial axial CT sections through the lesion in the carotid artery acquired in vivo.

Supplementary Video 3. Corresponding PAI images to Supplementary Fig. S6. Serial axial PAI/US sections through the lesion in the carotid artery. The photoacoustic NIRAPA signal is overlaid in color on B-mode US images (black and white) acquired ex vivo.

Supplementary Video 4. Corresponding CT images to Supplementary Fig. S6. Serial axial CT sections through the lesion in the carotid artery acquired in vivo.

## Supplementary Methods

### Near-infrared auto-photoacoustic (NIRAPA) imaging

The lateral resolution of the Vevo LAZR-X imaging system with a 15-MHz (10–22 MHz) linear-array transducer was 100  $\mu\text{m}$ , which also corresponds to the lateral spatial resolution of the transcriptomic data. In order to reduce ultrasound reflections, the human carotid plaque was placed on fixed gauze in a custom-made polyvinyl chloride plastisol vial (Item No. 8228SS, M-F Manufacturing Company). 0.35% intralipid (CAS Number: 68890-65-3, Sigma-Aldrich) was dissolved in phosphate buffered saline (PBS) to simulate tissue-specific light scattering properties.

### Immunohistochemistry

Five- $\mu\text{m}$  tissue sections were stained with hematoxylin and eosin (H&E), Masson's trichrome (Sigma Aldrich) and picosirius red (24901; Polysciences, USA). Picosirius red sections were imaged using polarized light (AxioImager Widefield Fluorescence Microscope, Zeiss).

After the plaques were fixed in 4% paraformaldehyde (PFA) and paraffin embedded, 5- $\mu\text{m}$  slices were sectioned from the tissue block. Paraffin was removed using Xylene and then hydrated deploying an alcohol/water gradient. The de-paraffinized slides were air dried and imaged for the NIRAF signal using a digital slide scanner (CY5, Olympus VS120, exposure time 500 ms, 20x objective). The staining protocol was continued by antigen retrieval in citrate buffer (cat. no.: C9999, Sigma-Aldrich, USA) for 20 min at 95 degrees Celsius. After the slides reached room temperature, they were washed using a wash buffer (PBS + 0.1% Tween) and subsequently treated with 3% hydrogen peroxide for 10 min to block endogenous peroxidase activity. Following an additional washing step in wash buffer, the sections were incubated with goat serum (Vector Laboratories, CA, USA) for 30 min. The sections were then covered with a primary antibody and incubated overnight at 4 degrees Celsius. Anti-CD68 (clone KP1, BioLegend, USA, dilution 1:250), anti-alpha-SMA (cat no: ab5694, Abcam, USA, dilution 1:200) and anti-bilirubin (clone 24G7, Shino-test, Kanagawa, Japan, dilution 1:200) were used as primary antibodies. After washing off the primary antibody, the sections were incubated with a corresponding biotinylated secondary antibody for 30 min at room temperature. Following an additional washing step, the sections were incubated with a DAB (3, 3'-diaminobenzidine) substrate kit for peroxidase detection (Vector Laboratories). No counterstaining was performed to achieve maximal contrast for digital imaging processing.

### Cluster annotation

The macrophage cluster was isolated and further sub-clustered with a resolution value of 0.8, 20 k-nearest neighbors, and a Jaccard index cutoff of 0.005. The macrophage cluster was annotated based on the expression of *CD68*, *CD14*, *HLA-DRB1*, *HLA-DRA*, and *APOE*. The *ACTA2*<sup>+</sup> myofibroblast cluster was based on the expression of *ACTA2*, *COL1A1*, *COL1A2*, and *CNN2*. Pro-inflammatory macrophages were defined by the higher expression of *CD74*, *HLA-DRA*, and *APOE*[1]. Foamy macrophages were defined by the higher expression of *CTSB*, *TREM1*, *S100A10*, and *SPP1*[1]. A cluster, with combined weak expression of *COL1A1*, *COL3A1*, *CD68*, *CD14* and *SPP1*, was categorized as smooth muscle cell (SMC) derived intermediate cell types[2].

### Enrichment analysis

Spatial sequencing results from vulnerable and stable plaques were combined, and their differential expression genes were determined by comparing the fold change of mean expression across the genes based on a negative binomial distribution. Genes with a fold change > 0, denoting upregulation, were selected and enriched with the gene ontology biological process database[3].

### Transcriptomic correlation with NIR

To prepare spatial transcriptomics outputs for signal correlation with NIR, we first plotted gene expression levels in gray scale. Subsequently, we isolated the spatial spots as an image and performed a circular median filtering process with a filter diameter of 15 pixels. The image intensities were then normalized based on minimum to maximum normalization. Regions of interest across the plaque were selected for key genes and the Pearson's correlation for expression and image intensities was calculated and plotted.

## Supplementary Figures and Tables

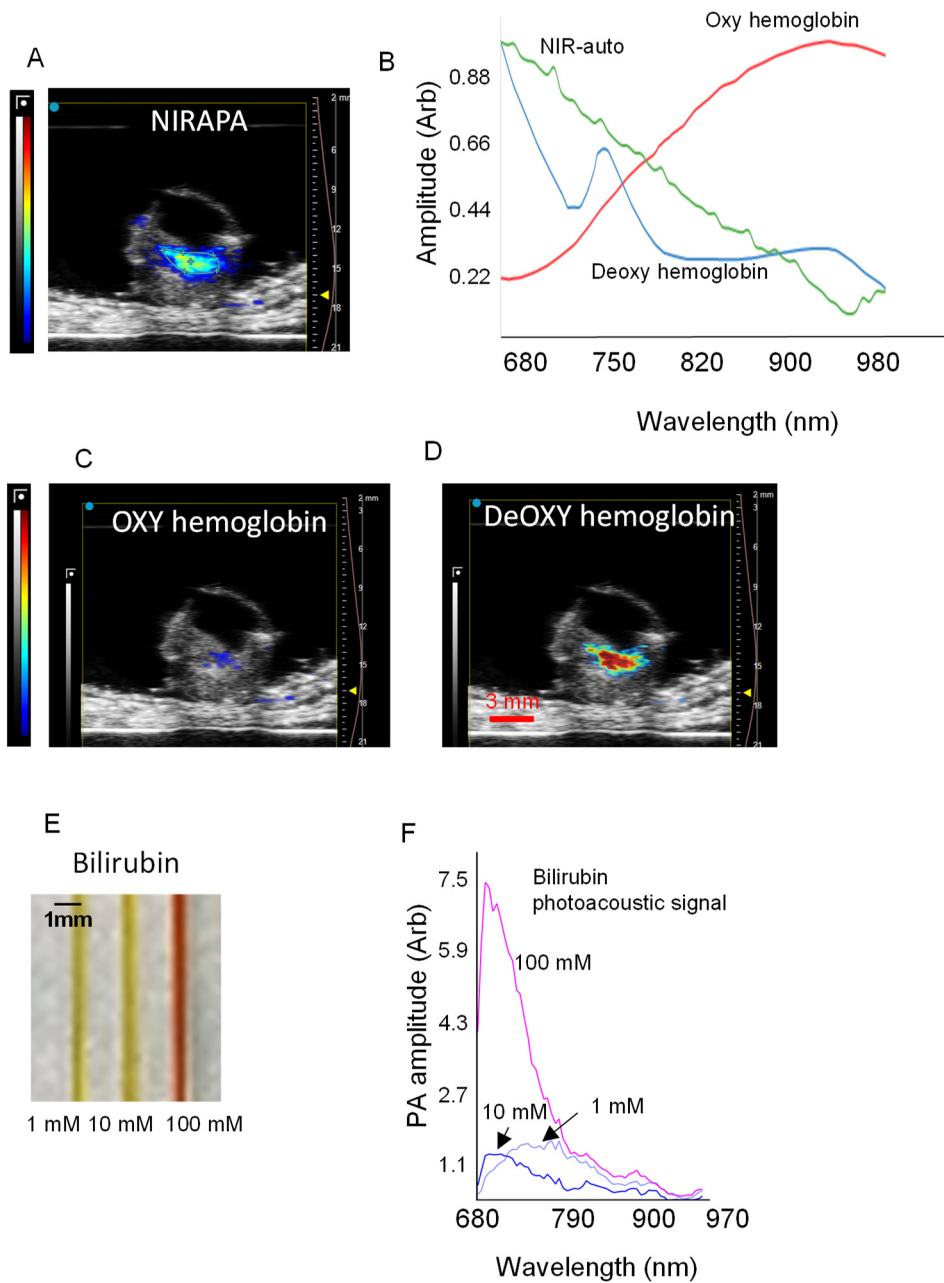

**Supplementary Fig. 1. Spectrum of the NIRAPA signal and the bilirubin correlation.** A) Near-infrared auto-photoacoustic (NIRAPA) sample image. B) Spectra of NIRAPA (NIR-auto) and Vevo unmixing into spectra for oxyhemoglobin ( $\text{HbO}_2$ ) and deoxyhemoglobin (Hb). C-D) Spectrally unmixed images of C) Oxyhemoglobin ( $\text{HbO}_2$ ), D) Deoxyhemoglobin (Hb) calculated by Vevo. E) Photoacoustic phantom containing 1 mM, 10 mM and 100 mM of bilirubin in dimethyl sulfoxide (DMSO). F) Photoacoustic (PA) signal spectra of different bilirubin concentrations.

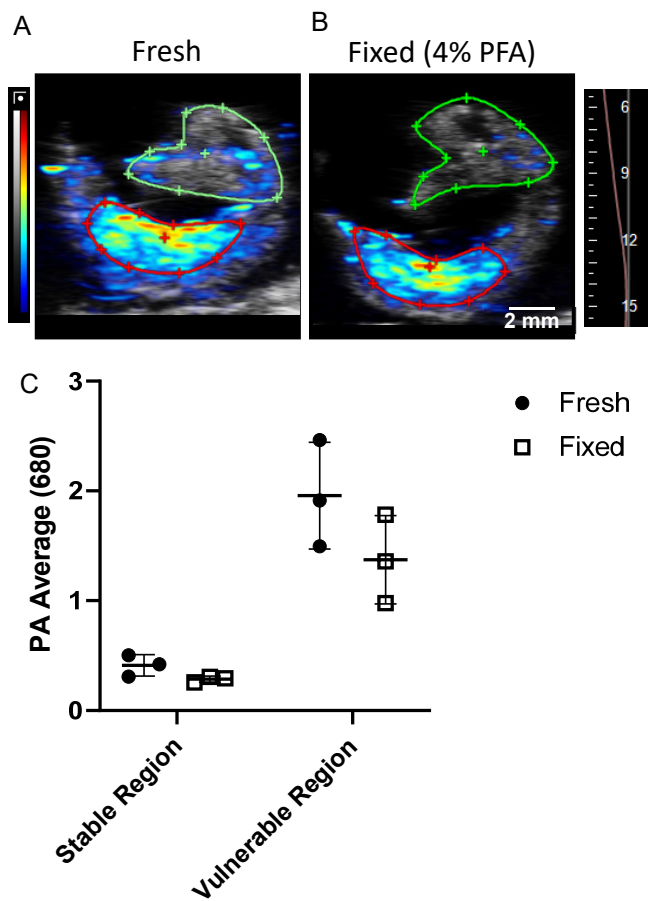

**Supplementary Fig. 2. Comparing NIRAPA signal in fresh and 4% PFA fixed carotid plaque tissue.**

A) Fresh/unfixed plaque tissue showing the NIRAPA signal in stable (green) and vulnerable (red) plaque areas. B) Same plaque tissue, but fixed with 4% PFA. NIRAPA signal intensity in stable (green) and vulnerable (red) plaque areas. C) NIRAPA signal intensity results (PA Average (680)) in stable and vulnerable plaque regions acquired from 3 representative images of a 3D longitudinal plaque scan.

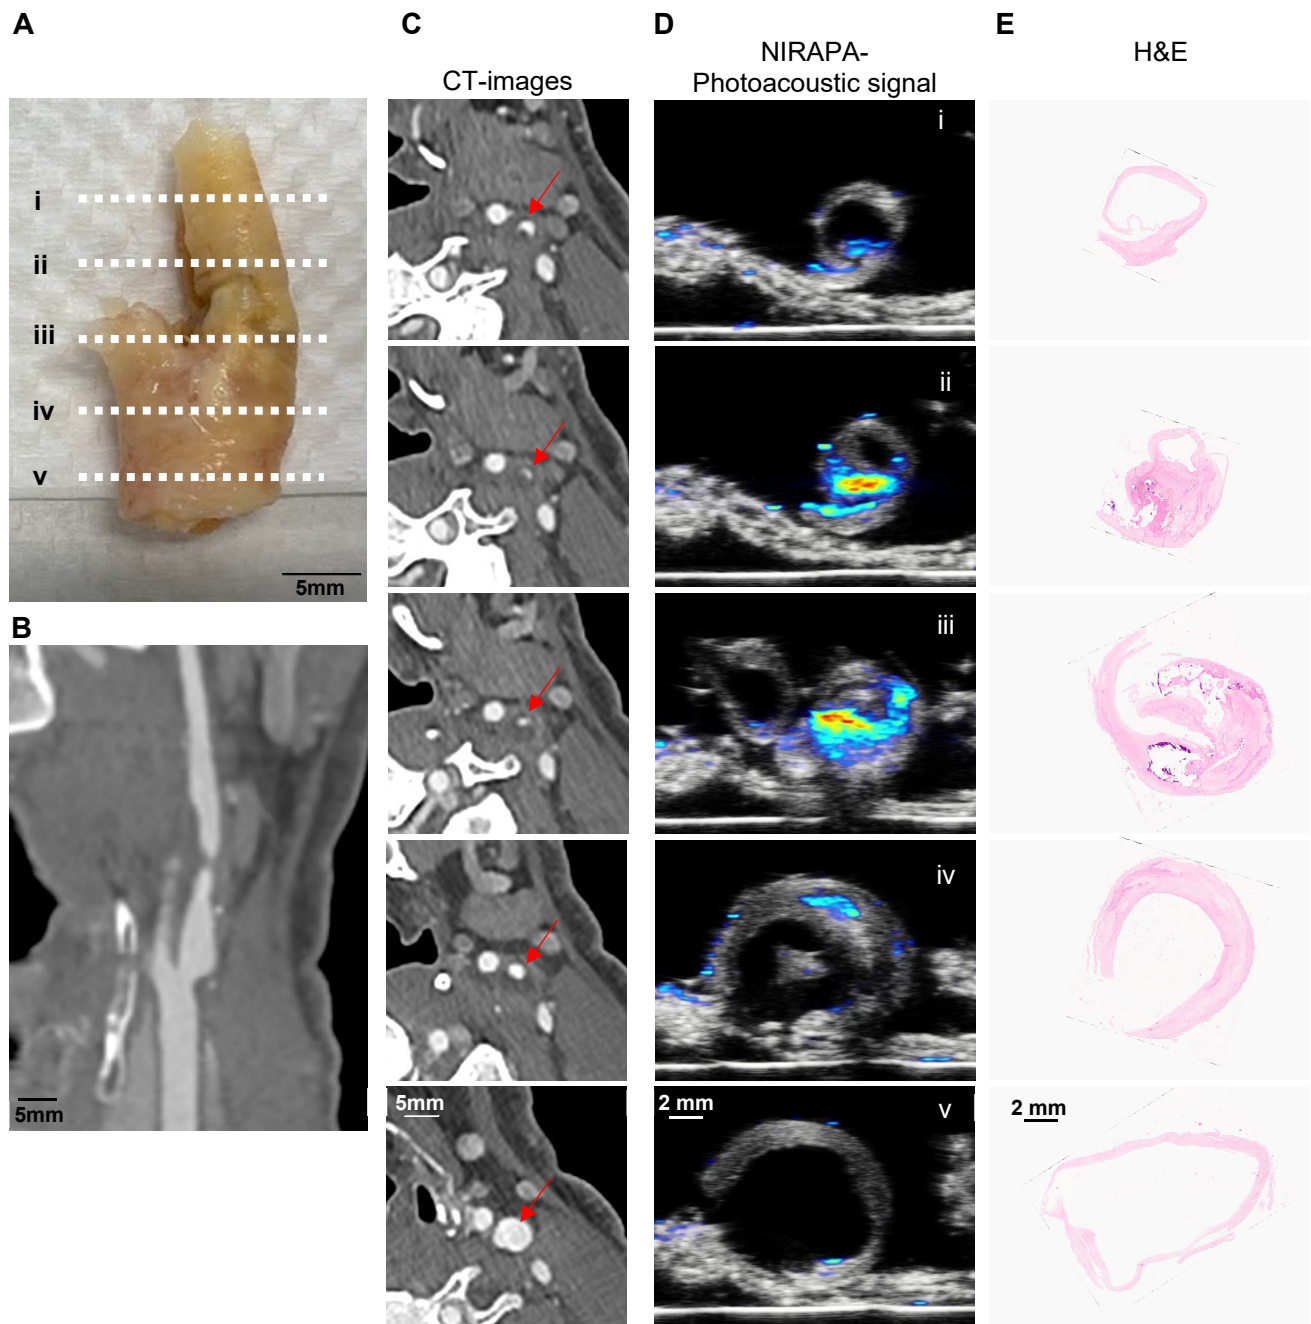

**Supplementary Fig. 3. Comparison of contrast CT images with PAI images using the NIRAPA signal to detect vulnerable plaque composition of a stable carotid artery.** A) Human carotid endarterectomy (CEA) specimen under white light. B) Corresponding longitudinal contrast computed tomography (CT) image shown underneath. The dashed lines on the longitudinal image represent the imaging locations of the axial images in columns C-E. C) Serial axial CT sections through the lesion of the carotid artery with locations of the stenosis shown by red arrows. D) Serial axial PAI sections through the lesion of the carotid artery showing the NIRAPA signal. E) Corresponding H&E stains.

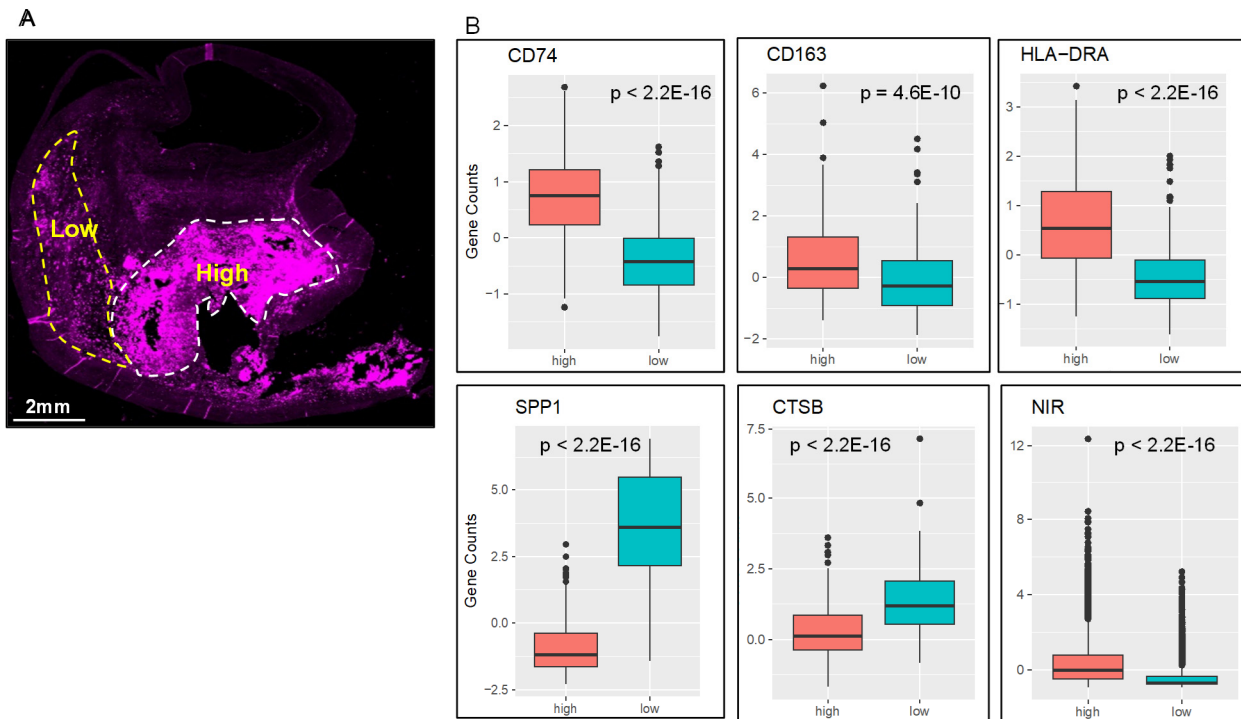

**Supplementary Fig. 4. Quantification and statistical comparison of the key gene counts corresponding to NIRAF signal regions based on Visium spatial transcriptomics with the high and low regions determined by NIRAF microscopic imaging. A) Plaque regions with high and low NIRAF signal and B) *CD74*, *CD163*, *HLA-DRA*, *SPP1*, *CTSB* and NIRAF (NIR) signal level comparison between high and low signal regions and their p-values.**

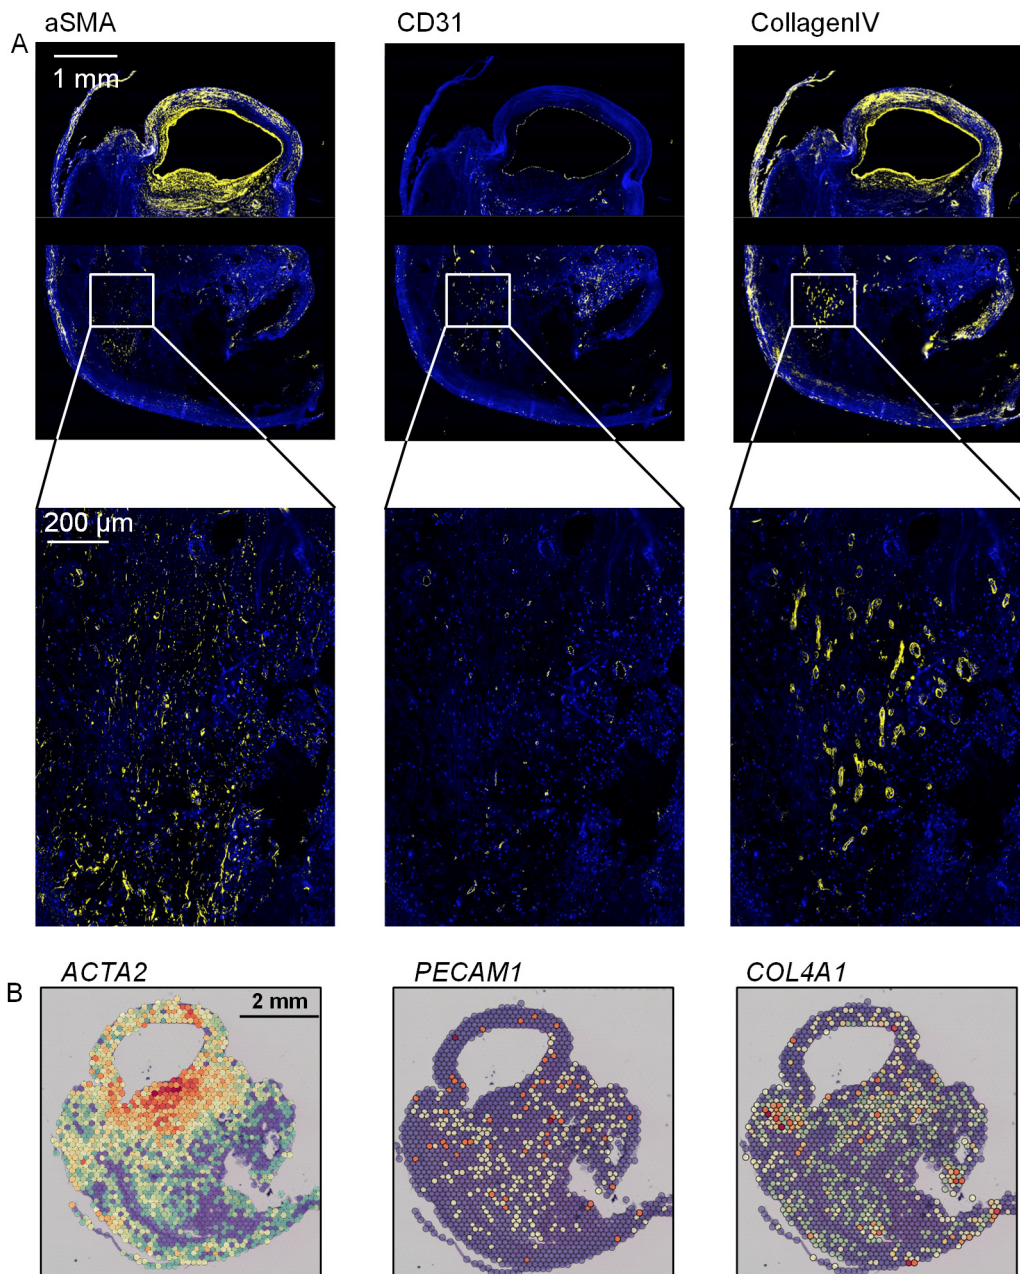

**Supplementary Fig. 5. Spatial correspondence of the transcriptomic and proteomic signals for protein and gene pairs.** Comparison of the A) proteomic and B) transcriptomic maps across the plaque for the following protein/gene pairs:  $\alpha$ SMA protein and *ACTA2* gene, CD31 protein and *PECAM1* gene, and Collagen IV protein and *COL4A1* gene.



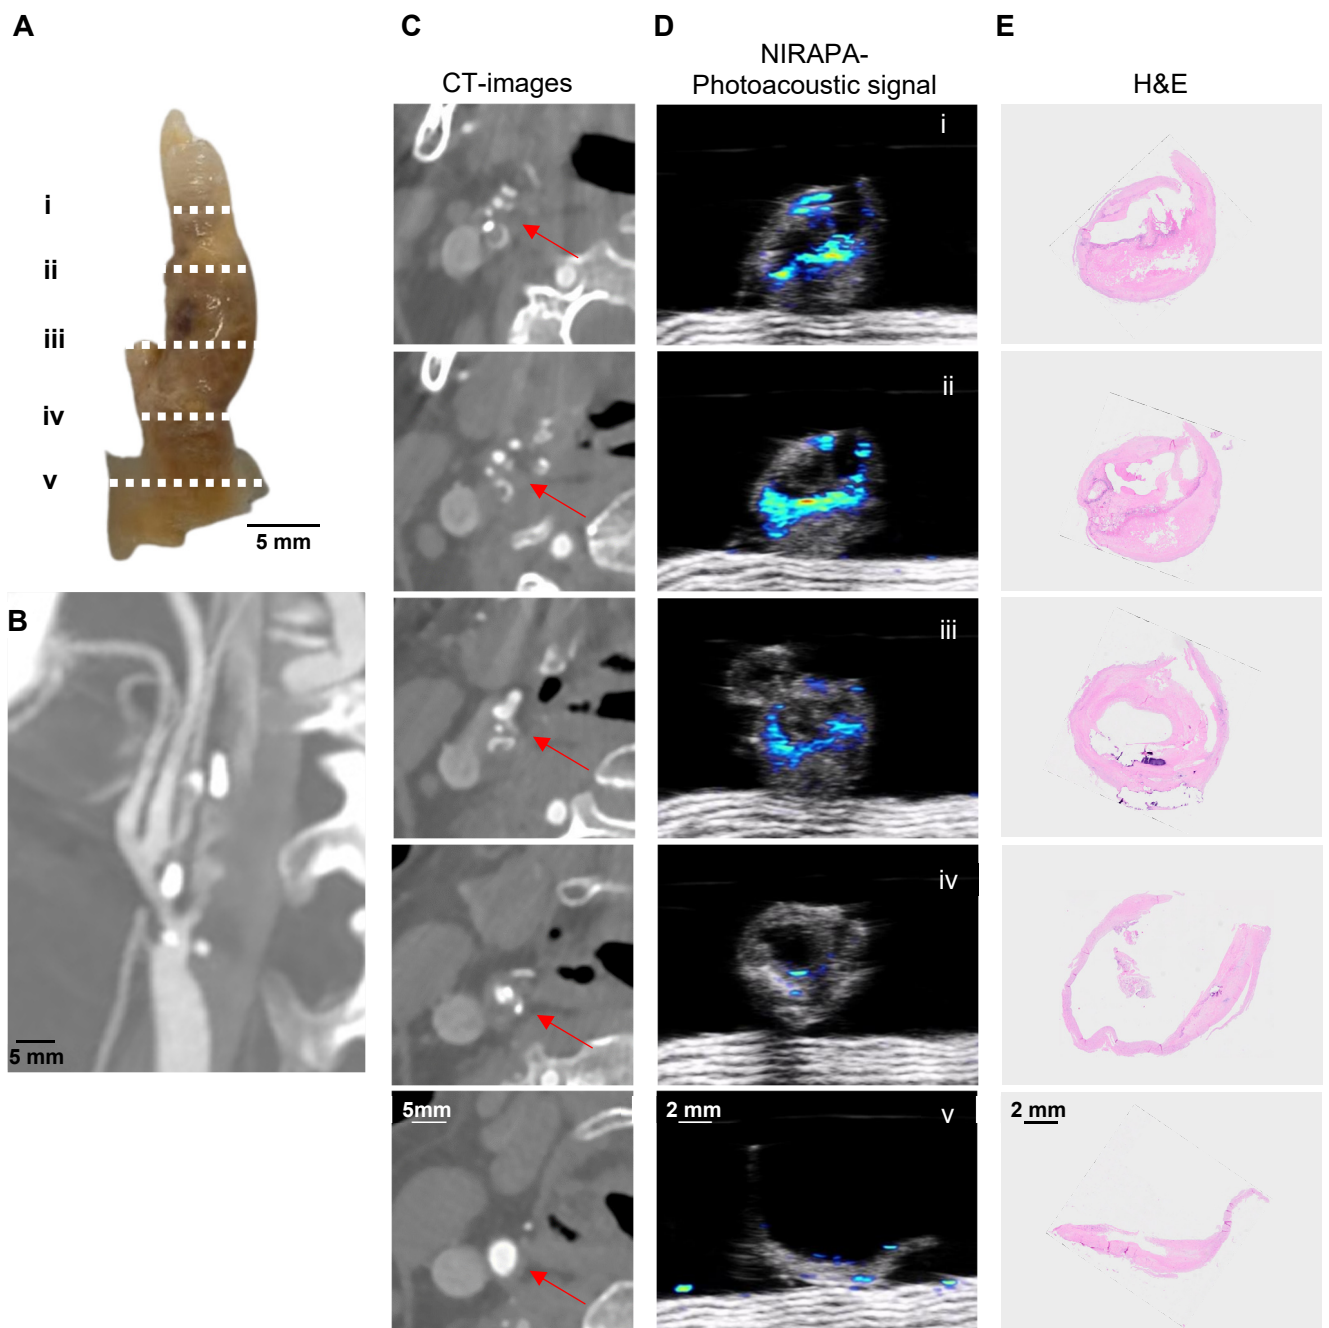

**Supplementary Fig. 6. Comparison of contrast CT images with PAI images using the NIRAPA signal to detect vulnerable plaque compositions of a vulnerable carotid artery.** A) Human carotid endarterectomy (CEA) specimen under white light. B) Corresponding longitudinal contrast computed tomography (CT) image shown underneath. The dashed lines on the longitudinal image represent the imaging locations of the axial images in columns C-E. C) Serial axial CT sections through the lesion of the carotid artery. Red arrows indicate location of stenosis. D) Serial axial PAI sections through the lesion of the carotid artery showing the NIRAPA signal. E) Corresponding H&E stains.

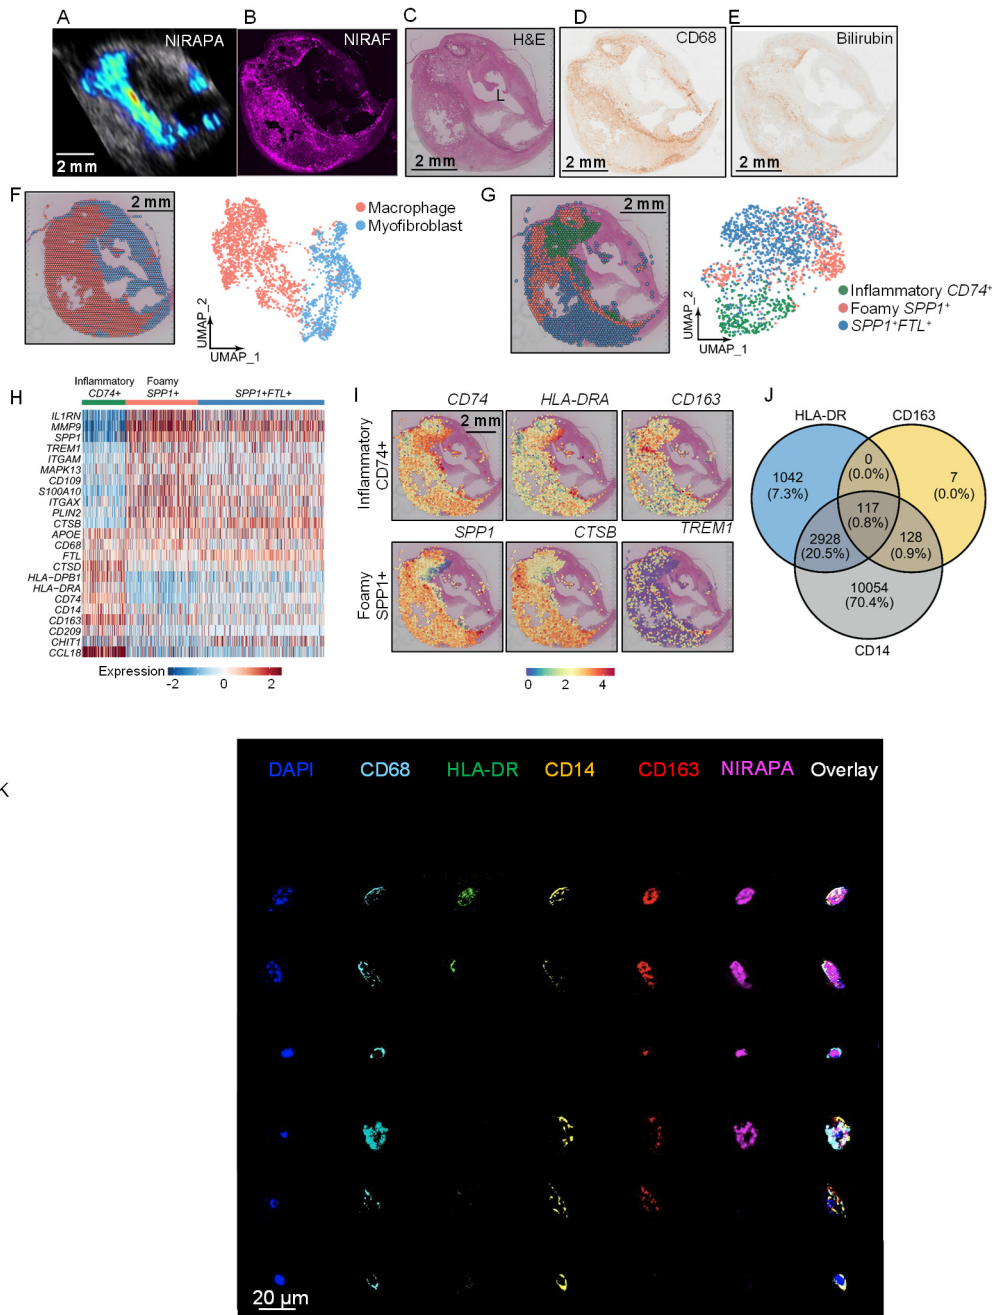

**Supplementary Fig. 7. Spatial transcriptomic and proteomic analysis of vulnerable plaque delineates spatially-dependent macrophage populations.** A-B) NIRAPA (A) and NIRAF (B) images of a carotid plaque cross section. C-E) Histological sections of the carotid endarterectomy (CEA) specimen stained with C) H&E, D) CD68 and E) bilirubin. F) Overlay and Uniform Manifold Approximation and Projection (UMAP) cluster projection of spatial transcriptomics on carotid plaque H&E. Based on their gene expression, clusters have been assigned to macrophage, myofibroblast and SMC intermediate cell types. G) Spatial deconvolution and UMAP of the macrophage cluster in CD74<sup>+</sup> and SPP1<sup>+</sup> regions and the spatial location on the H&E cross section. UMAP projection of macrophage high-resolution subtype clustering shows CD74<sup>+</sup>, SPP1<sup>+</sup>, and SPP1<sup>+</sup>FTL<sup>+</sup> populations. H) Heatmap of macrophage-specific gene signatures that differentiate the CD74<sup>+</sup>, SPP1<sup>+</sup>, and SPP1<sup>+</sup>FTL<sup>+</sup> macrophage subpopulations. I) Key genes differentiating inflammatory (CD74<sup>+</sup>) and foamy (SPP1<sup>+</sup>) macrophages and their spatial location on the CEA specimen. J) Venn diagram of macrophage markers based on single-cell identification on CODEX. K) CODEX imaging of individual cells within the plaque shown in A-E to validate the source of the NIRAPA signal. P value cutoff is 0.005. Log<sub>2</sub>FC cutoff is 2. L: Lumen.

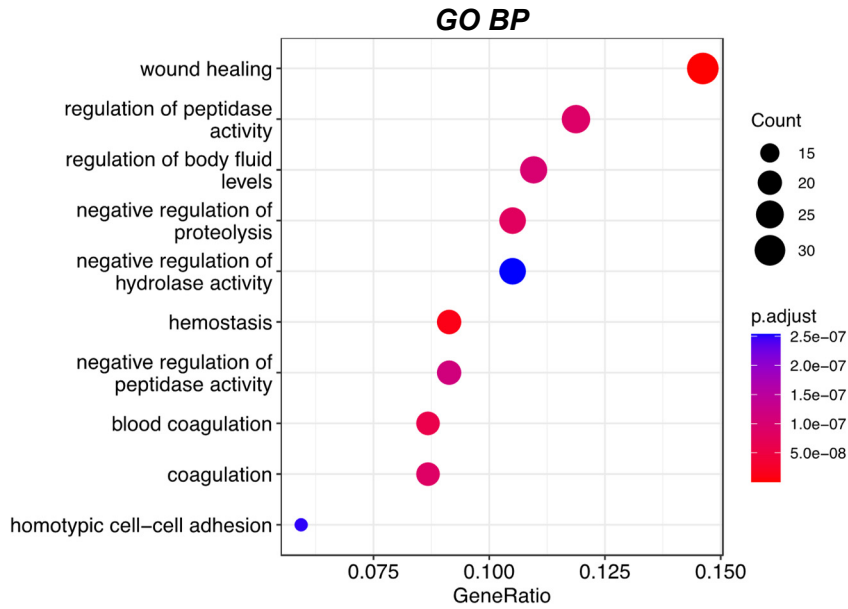

**Supplementary Fig. 8. Enrichment results of vulnerable vs stable plaque.** The differentially-expressed genes between vulnerable and stable plaque were determined by comparing mean gene expression values. Differentially-expressed genes with a fold change larger than 0 were then compared with gene ontology biological process (GO BP) database and the top 10 most significant biological processes based on adjusted p values were plotted.

**Supplementary Table 1. Patient data and experimental plan**

| Case | Age | Sex | Symptoms | Fibrous Cap Thickness (Pathologist) | Ultrasound % stenosis | NIRAF | CD68, Bilirubin, Picrosirius Red, H&E, Masson's Trichrome, alpha SMA | Spatial Transcriptomics and proteomics | CT/CTA                                                                                                                                                                                                                                                |
|------|-----|-----|----------|-------------------------------------|-----------------------|-------|----------------------------------------------------------------------|----------------------------------------|-------------------------------------------------------------------------------------------------------------------------------------------------------------------------------------------------------------------------------------------------------|
| #1   | 75  | M   | yes      | 46                                  | 80-90%                | X     | X                                                                    |                                        | None                                                                                                                                                                                                                                                  |
| #2   | 71  | M   | No       | 16                                  | > 70%                 | X     | X                                                                    |                                        | None                                                                                                                                                                                                                                                  |
| #3   | 62  | M   | No       | 67                                  | ~60%                  | X     | X                                                                    |                                        | Short segment moderate stenosis (~ 60%) of the proximal left ICA                                                                                                                                                                                      |
| #4   | 72  | M   | yes      | 0                                   | > 70%                 | X     | X                                                                    |                                        | None                                                                                                                                                                                                                                                  |
| #5   | 73  | M   | no       | 15                                  | 90-99%                | X     | X                                                                    |                                        | None                                                                                                                                                                                                                                                  |
| #6   | 69  | M   | no       | 0                                   | critical              | X     | X                                                                    |                                        | None                                                                                                                                                                                                                                                  |
| #7   | 64  | M   | no       | 21                                  | 80-90%                | X     | X                                                                    |                                        | None                                                                                                                                                                                                                                                  |
| #8   | 64  | M   | no       | 0                                   | 80-90%                | X     | X                                                                    |                                        | Right w/ severe calcified and noncalcified atherosclerotic plaque of the right ICA just distal to the carotid bulb resulting in >90% stenosis. Additional focal outpouching consistent with deep plaque ulceration or focal pseudoaneurysm formation. |
| #9   | 66  | F   | yes      | 0                                   | 90%                   | X     | X                                                                    |                                        | Severe (90%) stenosis of the L ICA bulb.                                                                                                                                                                                                              |
| #10  | 54  | M   | no       | 453                                 | 70-80%                | X     | X                                                                    |                                        | None                                                                                                                                                                                                                                                  |
| #11  | 66  | F   | Yes      | 31                                  | 90%                   | X     | X                                                                    |                                        | None                                                                                                                                                                                                                                                  |
| #12  | 76  | M   | yes      | 70                                  | 95%                   | X     | X                                                                    |                                        | Bilateral cervical carotid artery stenoses, with calcifications, at the carotid bifurcation. L ICA 95%,                                                                                                                                               |
| #13  | 62  | F   | yes      | 0                                   | 99%                   | X     | X                                                                    |                                        | None                                                                                                                                                                                                                                                  |
| #14  | 63  | F   | no       | 75                                  | 70-80%                | X     | X                                                                    |                                        | 70-80% of L proximal ICA ,                                                                                                                                                                                                                            |
| #15  | 76  | M   | yes      | 248                                 | 85%                   | X     | X                                                                    |                                        | Bilateral cervical carotid artery stenoses, with calcifications, at the carotid bifurcation. R ICA 85%.                                                                                                                                               |
| #16  | 69  | M   | no       | 0                                   | ~95%                  | X     | X                                                                    |                                        | Bilateral carotide artery siphon stenosis                                                                                                                                                                                                             |
| #17  | 79  | M   | yes      | 30                                  | 60%                   | X     | X                                                                    |                                        | 60% stenosis at the right ICA origin                                                                                                                                                                                                                  |
| #18  | 80  | M   | no       | 774                                 | -                     | X     | X                                                                    |                                        | Redemonstration of the severe arteriosclerotic irregularity of the bilaateral carotid                                                                                                                                                                 |

|     |    |   |     |    |        |   |   |   |                                                                                                                                                   |
|-----|----|---|-----|----|--------|---|---|---|---------------------------------------------------------------------------------------------------------------------------------------------------|
|     |    |   |     |    |        |   |   |   | siphons, right greater than left, with multifocal areas of severe stenosis.                                                                       |
| #19 | 70 | M | no  | 15 | 90-99% | X | X |   | None                                                                                                                                              |
| #20 | 83 | M | no  | 0  | 90-99% | X | X |   | Multifocal atherosclerotic disease with a short 6mm segment of occlusion of the right proximal internal carotid artery with distal reconstitution |
| #21 | 56 | M | yes | 0  | 60%    | X | X |   | 60% stenosis of the proximal R ICA                                                                                                                |
| #22 | 84 | M | yes | 0  | 70-99% | X | X |   | Critical stenosis of R ICA                                                                                                                        |
| #23 | 58 | M | yes | 73 | 99%    | X | X | X | Critical stenosis of the L ICA at the level of the distal bulb                                                                                    |
| #24 | 56 | F | yes | 0  | 99%    | X | X | X | Critical stenosis of right ICA at level of carotid bulb.                                                                                          |

**Supplementary Table 2. CODEX Antibodies**

| <b>Antigen</b> | <b>Clone</b> | <b>Company</b>    | <b>Catalog</b> | <b>CODEX Oligo</b> | <b>Working Dilution</b> | <b>Exposure Time</b> |
|----------------|--------------|-------------------|----------------|--------------------|-------------------------|----------------------|
| ATM            | EP1890Y      | Akoya Biosciences | 4250095        |                    | 831:200                 | 1/3 s                |
| Bcl-2          | EPR17509     | Akoya Biosciences | 4550089        |                    | 851:100                 | 1/6.5 s              |
| Caveolin       | D46G3        | Akoya Biosciences | 4550084        |                    | 861:200                 | 1/6.5 s              |
| CD11c          | 118/A5       | Akoya Biosciences | 4550114        |                    | 241:200                 | 1/3 s                |
| CD14           | EPR3653      | Akoya Biosciences | 4450047        |                    | 371:200                 | 1/6.5 s              |
| CD141          | E7Y9P        | Akoya Biosciences | 4250097        |                    | 871:200                 | 1/6.5 s              |
| CD163          | EPR19518     | Akoya Biosciences | 4250079        |                    | 691:200                 | 1/3 s                |
| CD20           | L26          | Akoya Biosciences | 4150018        |                    | 71:100                  | 1/3 s                |
| CD21           | EP3093       | Akoya Biosciences | 4450027        |                    | 321:100                 | 1/3 s                |
| CD3            | EP449E       | Akoya Biosciences | 4550119        |                    | 451:100                 | 9/20 s               |
| CD31           | EP3095       | Akoya Biosciences | 4450017        |                    | 11:100                  | 1/4 s                |
| CD34           | QBEnd/10     | Akoya Biosciences | 4250057        |                    | 251:200                 | 1/3 s                |
| CD38           | E7Z8C        | Akoya Biosciences | 4250080        |                    | 891:200                 | 1/6.5 s              |
| CD39           | EPR20627     | Akoya Biosciences | 4250076        |                    | 991:100                 | 1/3 s                |
| CD4            | EPR6855      | Akoya Biosciences | 4550112        |                    | 31:200                  | 1/3 s                |
| CD40           | D8W3N        | Akoya Biosciences | 4550064        |                    | 101:66                  | 1/3 s                |
| CD44           | IM7          | Akoya Biosciences | 4450041        |                    | 51:200                  | 1/3 s                |
| CD45           | D9M81        | Akoya Biosciences | 4550089        |                    | 211:200                 | 1/3 s                |
| CD45RO         | UCHL1        | Akoya Biosciences | 4250023        |                    | 171:200                 | 1/3 s                |
| CD66           | ASL-32       | Akoya Biosciences | 4550001        |                    | 161:800                 | 1/3 s                |
| CD68           | KP1          | Akoya Biosciences | 4550113        |                    | 151:200                 | 1/3 s                |
| CD79a          | D1X5C        | Akoya Biosciences | 4450078        |                    | 901:200                 | 1/3 s                |
| CD8            | C8/144B      | Akoya Biosciences | 4250012        |                    | 261:200                 | 9/20 s               |
| Collagen IV    | EPR20966     | Akoya Biosciences | 4550122        |                    | 421:200                 | 1/6.5 s              |
| E-Cadherin     | 4A2C7        | Akoya Biosciences | 4250021        |                    | 141:200                 | 1/3 s                |
| EpCAM          | D9S3P        | Akoya Biosciences | 4450088        |                    | 911:200                 | 1/3 s                |
| ERa            | SP1          | Akoya Biosciences | 4250074        |                    | 841:200                 | 1/3 s                |
| FOXP3          | 236A/E7      | Akoya Biosciences | 4550071        |                    | 311:50                  | 1/3 s                |
| Galectin-3     | M3/38        | Akoya Biosciences | 4450034        |                    | 351:200                 | 1/6.5 s              |
| GATA3          | D13C9        | Akoya Biosciences | 4250085        |                    | 491:100                 | 1/3 s                |
| GranzymeB      | D6E9W        | Akoya Biosciences | 4250055        |                    | 411:200                 | 1/3 s                |
| HLA-A          | EP1395Y      | Akoya Biosciences | 4450046        |                    | 41:200                  | 1/3 s                |
| HLA-DR         | EPR3692      | Akoya Biosciences | 4550118        |                    | 331:200                 | 1/3 s                |
| HLA-E          | MEM-E/02     | Akoya Biosciences | 4250065        |                    | 341:200                 | 1/3 s                |
| ICOS           | D1K2T        | Akoya Biosciences | 4550117        |                    | 541:200                 | 1/3 s                |
| IDO1           | V1NC3IDO     | Akoya Biosciences | 4550123        |                    | 271:200                 | 1/3 s                |

|                 |           |                   |         |         |         |
|-----------------|-----------|-------------------|---------|---------|---------|
| IFNg            | EPR21704  | Akoya Biosciences | 4250062 | 201:200 | 1/3 s   |
| Keratin 8/18    | C51       | Akoya Biosciences | 4550082 | 811:200 | 1/6.5 s |
| Ki67            | B56       | Akoya Biosciences | 4250019 | 471:100 | 1/3 s   |
| LAG3            | EPR20261  | Akoya Biosciences | 4550058 | 551:50  | 1/3 s   |
| MPO             | E1E71     | Akoya Biosciences | 4250083 | 981:200 | 1/3 s   |
| Pan-Cytokeratin | AE-1/AE-3 | Akoya Biosciences | 4150020 | 191:200 | 1/6.5 s |
| PCNA            | PC10      | Akoya Biosciences | 4550124 | 361:200 | 1/6.5 s |
| PD-1            | D4W2J     | Akoya Biosciences | 4550038 | 461:50  | 1/3 s   |
| PD-L1           | 73-10     | Akoya Biosciences | 4550072 | 431:100 | 1/3 s   |
| Podoplanin      | NC-08     | Akoya Biosciences | 4250004 | 231:200 | 1/3 s   |
| SMA             | 1A4       | Akoya Biosciences | 4450049 | 131:200 | 1/6.5 s |
| TIGIT           | BLR047F   | Akoya Biosciences | 4250061 | 21:66   | 1/3 s   |
| TP63            | W15093A   | Akoya Biosciences | 4550081 | 931:800 | 1/3 s   |
| Vimentin        | O91D3     | Akoya Biosciences | 4450050 | 221:200 | 1/6.5 s |
| VISTA           | D162G     | Akoya Biosciences | 4250063 | 401:66  | 1/3 s   |

## Supplementary references

- [1] L. Willemsen, M.P. de Winther, Macrophage subsets in atherosclerosis as defined by single-cell technologies, *The Journal of pathology* 250(5) (2020) 705-714.
- [2] H. Pan, C. Xue, B.J. Auerbach, J. Fan, A.C. Bashore, J. Cui, D.Y. Yang, S.B. Trignano, W. Liu, J. Shi, Single-cell genomics reveals a novel cell state during smooth muscle cell phenotypic switching and potential therapeutic targets for atherosclerosis in mouse and human, *Circulation* 142(21) (2020) 2060-2075.
- [3] T. Wu, E. Hu, S. Xu, M. Chen, P. Guo, Z. Dai, T. Feng, L. Zhou, W. Tang, L. Zhan, X. Fu, S. Liu, X. Bo, G. Yu, clusterProfiler 4.0: A universal enrichment tool for interpreting omics data, *Innovation (Camb)* 2(3) (2021) 100141.
